# Supplementary material for: Unique Proteomic Signatures Distinguish Macrophages and Dendritic Cells
Source: PLoS One. 2012 Mar 12;7(3):e33297. doi: 10.1371/journal.pone.0033297 (PMC3299764; doi:10.1371/journal.pone.0033297)
Supplement: Table S1 — Plasma membrane proteins detected by LC-ESI-MS/MS in myeloid cells. Bone marrow precursor cells were differentiated into bone marrow-derived macrophages (BmM), classically-activated macrophages (M1), alternatively-activated macrophages (M2), and bone marrow-derived dendritic cells (BmDC). Plasma membrane proteins for each cell type (N = 6) were isolated, analyzed by mass spectrometry, and quantified by spectral counting, the total number of peptides identified by LC-ESI-MS/MS analysis. (XLSX) [file pone.0033297.s004.xlsx]

## Sheet: Table S1
Table S1: Plasma membrane proteins detected in polarized macrophages and dendritic cells
BmM = bone marrow-derived macrophage, M1 = classically activated macrophage, M2 = alternatively activated macrophage, BmDC = bone marrow-derived dendritic cell
Proteins were quantified by spectral counting, the total number of peptides identified for each protein in LC-ESI-MS/MS analysis
			M2							M1							BmM							BmDC
IPI	Entrez	Protein	1	2	3	4	5	6	M2 Avg	1	2	3	4	5	6	M1 Avg	1	2	3	4	5	6	BmM Avg	1	2	3	4	5	6	DC Avg
IPI00120674	16409	ITGAM	179	204	183	217	157	165	184.167	143	136	117	154	180	155	147.5	179	172	169	170	151	154	165.833	207	197	189	199	163	184	189.833
IPI00320605	16414	ITGB2	193	201	180	208	170	179	188.5	128	146	131	154	167	166	148.667	165	149	159	163	145	137	153	199	195	194	188	170	172	186.333
IPI00126186	17533	MRC1	155	174	152	156	138	140	152.5	80	89	77	108	114	96	94	145	136	155	137	133	120	137.667	12	15	12	19	9	11	13
IPI00126092	19264	PTPRC	74	93	92	105	79	78	86.8333	67	68	50	81	102	90	76.3333	78	78	73	79	68	76	75.3333	82	69	78	94	72	67	77
IPI00319509	16790	ANPEP	127	135	127	151	109	96	124.167	70	50	46	53	69	53	56.8333	69	57	59	57	63	59	60.6667	42	48	36	56	28	49	43.1667
IPI00119063	16971	LRP1	61	63	39	41	41	45	48.3333	17	26	11	34	31	27	24.3333	103	95	115	122	105	83	103.833	33	37	19	33	22	13	26.1667
IPI00331214	12491	CD36	69	74	57	70	65	81	69.3333	27	27	12	26	30	37	26.5	40	43	45	44	38	39	41.5	61	61	66	67	65	42	60.3333
IPI00124700	22042	TFRC	149	161	162	184	140	150	157.667	4	5	6	8	5	8	6	21	20	22	13	18	14	18	0	0	0	0	0	0	0
IPI00405742	140570	PLXNB2	42	53	36	36	32	39	39.6667	48	45	42	63	73	74	57.5	73	59	66	67	60	56	63.5	1	0	0	0	0	0	0.166667
IPI00135010	16411	ITGAX	110	109	79	114	83	88	97.1667	0	0	0	0	0	0	0	0	0	0	0	0	0	0	57	45	53	71	57	49	55.3333
IPI00111856	14129	FCGR1	28	29	28	31	27	29	28.6667	51	50	47	52	59	54	52.1667	65	54	54	59	65	64	60.1667	12	9	8	9	8	3	8.16667
IPI00130280	11946	ATP5A1	23	22	25	19	24	16	21.5	35	27	26	19	24	24	25.8333	35	25	34	36	36	32	33	63	60	61	68	51	52	59.1667
IPI00121378	11658	ALCAM	40	45	40	44	41	36	41	36	40	34	44	57	40	41.8333	37	41	47	36	40	30	38.5	17	17	14	20	16	12	16
IPI00114641	17254	SLC3A2	24	29	19	25	29	33	26.5	32	39	25	43	49	40	38	27	21	26	29	30	28	26.8333	28	30	31	37	42	35	33.8333
IPI00132474	16412	ITGB1	34	45	25	30	33	31	33	48	38	37	44	58	53	46.3333	35	36	31	29	35	29	32.5	14	11	17	11	12	5	11.6667
IPI00311682	11928	ATP1A1	41	47	46	50	41	38	43.8333	27	25	15	22	30	21	23.3333	31	35	29	34	26	28	30.5	18	24	20	25	17	13	19.5
IPI00124221	11933	ATP1B3	33	41	31	32	31	35	33.8333	21	18	15	16	26	20	19.3333	25	22	25	22	18	20	22	17	18	15	16	16	9	15.1667
IPI00122048	232975	ATP1A3	39	45	36	53	38	38	41.5	12	11	12	19	21	17	15.3333	21	23	26	21	18	14	20.5	12	13	11	17	7	13	12.1667
IPI00343568	17079	CD180	32	33	22	34	28	29	29.6667	21	26	15	27	28	33	25	21	23	27	30	25	29	25.8333	5	1	7	4	4	6	4.5
IPI00115976	16402	ITGA5	31	41	24	29	29	28	30.3333	24	25	27	33	41	38	31.3333	22	13	17	18	13	12	15.8333	4	6	5	6	6	3	5
IPI00677017	226101	FER1L3	0	0	0	1	1	0	0.333333	0	2	2	6	7	1	3	6	1	2	4	5	3	3.5	75	79	68	110	73	41	74.3333
IPI00122973	15894	ICAM1	0	1	3	2	0	1	1.16667	58	60	63	70	74	79	67.3333	5	6	7	8	3	1	5	7	8	7	6	7	8	7.16667
IPI00126248	104112	ACLY	0	2	0	1	1	0	0.666667	9	12	8	22	17	14	13.6667	27	26	32	22	21	19	24.5	36	26	39	28	20	20	28.1667
IPI00109996	14980	H2-L	26	25	18	28	20	26	23.8333	17	17	19	22	27	30	22	19	14	14	20	20	13	16.6667	7	5	6	2	2	1	3.83333
IPI00110806	14972	H2-K1	19	25	21	29	17	18	21.5	25	23	17	27	35	35	27	17	15	13	14	15	14	14.6667	3	4	4	5	1	0	2.83333
IPI00129158	19261	PTPNS1	20	21	19	32	22	23	22.8333	12	15	9	17	19	22	15.6667	27	22	26	25	23	22	24.1667	5	4	3	0	3	2	2.83333
IPI00117140	14130	FCGR2B	34	38	32	33	38	31	34.3333	12	7	12	16	13	15	12.5	4	5	4	6	9	6	5.66667	10	7	11	9	4	5	7.66667
IPI00407692	11964	ATP6V1A	22	25	17	19	17	21	20.1667	15	9	4	16	12	17	12.1667	19	13	13	15	13	18	15.1667	13	8	11	12	12	8	10.6667
IPI00308990	12475	CD14	1	3	2	0	2	0	1.33333	22	27	19	27	36	37	28	26	26	29	29	29	18	26.1667	1	1	0	2	0	1	0.833333
IPI00468481	11947	ATP5B	12	8	5	5	8	2	6.66667	14	16	13	17	17	23	16.6667	8	7	8	13	10	10	9.33333	19	18	11	26	26	23	20.5
IPI00120245	16410	ITGAV	36	37	31	32	32	29	32.8333	6	7	5	5	7	2	5.33333	17	9	6	9	5	4	8.33333	6	6	7	2	4	4	4.83333
IPI00129594	12523	CD84	25	31	22	26	24	23	25.1667	7	8	8	7	12	10	8.66667	12	8	10	12	9	10	10.1667	8	11	8	8	5	1	6.83333
IPI00123996	18186	NRP1	27	25	24	27	24	30	26.1667	6	2	3	5	6	6	4.66667	21	19	23	15	11	17	17.6667	0	3	2	3	2	2	2
IPI00403586	320024	AADACL1	11	14	11	13	16	17	13.6667	7	12	4	19	19	17	13	10	9	12	17	14	12	12.3333	11	11	10	10	10	6	9.66667
IPI00169585	18733	LILRB3	10	17	16	13	12	14	13.6667	16	20	17	22	22	25	20.3333	9	7	6	10	8	7	7.83333	6	4	5	7	6	4	5.33333
IPI00126969	15006	H2-Q1	19	21	16	15	10	16	16.1667	13	11	10	14	14	13	12.5	12	10	13	11	11	11	11.3333	5	6	8	5	2	1	4.5
IPI00223769	12505	CD44	16	13	13	13	14	13	13.6667	9	9	8	11	12	7	9.33333	11	11	11	11	11	14	11.5	10	11	10	10	9	6	9.33333
IPI00133707	14131	FCGR3	16	14	4	15	15	15	13.1667	9	12	4	10	10	10	9.16667	4	10	10	12	10	7	8.83333	12	10	11	11	13	7	10.6667
IPI00169818	211228	LRRC25	4	10	9	13	10	12	9.66667	6	14	13	20	21	21	15.8333	16	12	14	18	15	14	14.8333	0	0	1	1	0	0	0.333333
IPI00124444	56421	PFKP	7	6	6	7	8	7	6.83333	11	12	6	10	10	10	9.83333	9	11	10	12	10	9	10.1667	9	5	5	20	7	10	9.33333
IPI00122411	13733	EMR1	8	10	9	10	10	10	9.5	14	12	11	16	21	24	16.3333	7	6	9	11	7	10	8.33333	0	0	0	0	1	0	0.166667
IPI00228617	14678	GNAI2	5	4	6	6	5	4	5	4	5	4	6	6	9	5.66667	8	9	9	10	8	8	8.66667	23	23	17	10	5	5	13.8333
IPI00129646	17085	LY9	21	21	14	22	17	18	18.8333	6	7	4	6	11	14	8	6	6	6	6	2	1	4.5	2	1	1	0	0	2	1
IPI00116254	53381	PRDX4	5	5	4	4	4	4	4.33333	10	9	11	15	10	8	10.5	6	6	6	6	7	6	6.16667	11	12	12	10	10	12	11.1667
IPI00108003	12978	CSF1R	16	18	13	15	16	11	14.8333	0	0	0	1	0	0	0.166667	18	14	17	15	11	9	14	3	1	3	3	1	0	1.83333
IPI00117117	13058	CYBB	1	3	1	3	3	2	2.16667	7	5	4	6	5	5	5.33333	2	2	2	2	3	3	2.33333	23	20	22	23	16	16	20
IPI00128450	23943	MBC2	0	0	1	0	0	0	0.166667	1	0	0	1	2	1	0.833333	0	0	0	2	4	7	2.16667	19	16	23	45	27	27	26.1667
IPI00620550	20288	MSR1	6	7	7	6	5	4	5.83333	9	8	6	7	10	7	7.83333	8	8	9	8	6	8	7.83333	7	7	6	9	9	8	7.66667
IPI00109966	12010	B2M	12	10	8	8	9	11	9.66667	11	10	2	8	14	12	9.5	1	3	6	7	6	4	4.5	5	4	7	3	6	4	4.83333
IPI00119689	71770	AP2B1	2	0	6	3	6	5	3.66667	7	9	2	9	5	7	6.5	8	5	6	8	11	8	7.66667	13	12	14	10	8	6	10.5
IPI00230510	20612	SN	11	10	6	7	7	9	8.33333	19	13	7	7	9	8	10.5	7	14	7	8	11	9	9.33333	0	0	0	0	0	0	0
IPI00137311	18844	PLXNA1	20	14	12	8	10	8	12	3	7	6	8	19	14	9.5	0	2	0	2	1	4	1.5	5	5	5	6	4	1	4.33333
IPI00132286	16408	ITGAL	0	0	0	0	0	0	0	19	21	7	28	36	48	26.5	0	0	0	0	0	0	0	0	0	0	0	1	0	0.166667
IPI00626950	12495	ENTPD1	11	10	12	7	6	5	8.5	5	4	0	9	11	9	6.33333	6	4	2	5	8	6	5.16667	8	6	7	7	8	2	6.33333
IPI00227969	16403	ITGA6	1	2	0	2	3	2	1.66667	4	4	5	6	6	5	5	25	14	15	15	18	14	16.8333	3	1	0	1	1	0	1
IPI00128903	75345	SLAMF7	8	9	7	5	7	5	6.83333	12	11	13	16	18	15	14.1667	4	2	3	2	2	1	2.33333	1	1	2	1	1	0	1
IPI00322698	22368	TRPV2	3	7	4	6	5	4	4.83333	7	3	2	3	4	4	3.83333	5	6	3	11	4	7	6	9	8	9	11	7	7	8.5
IPI00113223	14104	FASN	0	0	0	0	0	0	0	0	0	0	4	2	4	1.66667	12	14	19	17	18	9	14.8333	7	1	9	6	4	6	5.5
IPI00309035	103963	RPN1	4	5	3	2	6	4	4	3	3	1	2	1	4	2.33333	2	1	5	4	2	6	3.33333	11	13	15	13	10	11	12.1667
IPI00132289	14728	LILRB4	6	6	6	7	5	7	6.16667	8	7	6	7	7	6	6.83333	6	4	6	5	2	4	4.5	5	4	4	5	4	3	4.16667
IPI00475154	20014	RPN2	4	3	4	5	3	2	3.5	1	2	0	1	1	8	2.16667	1	0	2	5	1	5	2.33333	7	13	9	14	8	16	11.1667
IPI00120264	15944	IRGM	0	0	0	0	0	0	0	15	11	12	22	23	22	17.5	0	0	0	1	4	2	1.16667	0	0	0	0	0	0	0
IPI00453776	216238	EEA1	0	0	0	0	0	0	0	1	0	0	0	0	0	0.166667	2	1	4	5	5	14	5.16667	16	16	18	10	12	5	12.8333
IPI00221921	12527	CD9	6	7	7	7	4	6	6.16667	0	2	0	1	1	2	1	4	2	2	2	3	1	2.33333	9	10	7	7	9	10	8.66667
IPI00135730	11841	ARF2	9	9	9	7	6	7	7.83333	6	3	3	6	9	5	5.33333	5	4	4	3	2	3	3.5	0	0	1	1	0	0	0.333333
IPI00131674	67373	2210010C04RIK	6	4	6	4	5	5	5	5	5	4	4	5	5	4.66667	4	4	6	6	6	5	5.16667	3	4	4	1	0	0	2
IPI00226205	21356	TAPBP	3	5	3	4	5	5	4.16667	4	5	0	9	14	12	7.33333	0	2	3	2	2	4	2.16667	2	0	2	6	4	5	3.16667
IPI00119293	14127	FCER1G	4	7	4	4	4	3	4.33333	5	4	5	6	5	7	5.33333	4	5	6	5	4	6	5	1	2	0	2	4	1	1.66667
IPI00469268	12469	CCT8	0	0	0	0	0	1	0.166667	1	1	1	5	0	2	1.66667	7	8	10	10	7	10	8.66667	7	8	12	4	0	3	5.66667
IPI00115564	11739	SLC25A4	2	1	3	1	4	2	2.16667	5	4	5	3	2	3	3.66667	2	3	5	2	2	2	2.66667	7	10	8	11	6	4	7.66667
IPI00153959	192187	STAB1	5	2	2	2	2	2	2.5	1	0	0	1	5	2	1.5	14	14	16	9	10	10	12.1667	0	0	0	0	0	0	0
IPI00116277	12464	CCT4	0	0	0	1	0	0	0.166667	3	2	0	6	6	6	3.83333	12	2	12	7	5	6	7.33333	7	4	5	8	3	0	4.5
IPI00125267	30960	VAPA	2	5	4	3	5	7	4.33333	2	2	2	4	3	5	3	3	3	4	4	5	4	3.83333	6	4	5	6	3	4	4.66667
IPI00466820	20116	RPS8	4	2	4	2	5	3	3.33333	5	7	3	5	5	2	4.5	4	4	6	5	3	2	4	4	4	5	5	3	2	3.83333
IPI00658632	17476	MPEG1	7	9	5	4	4	2	5.16667	4	6	4	4	9	9	6	4	1	5	4	7	4	4.16667	0	0	0	0	0	1	0.166667
IPI00125726	18126	NOS2	0	0	0	0	0	0	0	7	5	6	26	24	25	15.5	0	0	0	0	0	0	0	0	0	0	0	0	0	0
IPI00109254	60533	CD274	3	1	3	0	3	0	1.66667	7	7	11	21	17	20	13.8333	0	0	0	0	0	0	0	0	0	0	0	0	0	0
IPI00323881	16211	KPNB1	3	1	3	1	4	3	2.5	6	3	0	2	9	9	4.83333	2	7	3	3	2	4	3.5	5	2	3	2	6	7	4.16667
IPI00380425	80911	ACOX3	0	0	0	0	0	0	0	0	0	0	0	0	0	0	0	3	0	1	1	0	0.833333	16	16	16	16	5	15	14
IPI00113802	12267	C3AR1	9	12	8	8	8	6	8.5	0	0	0	1	3	3	1.16667	4	4	4	5	3	6	4.33333	0	0	0	0	0	0	0
IPI00126245	68428	STEAP3	11	14	7	8	4	5	8.16667	1	2	1	0	0	0	0.666667	6	5	3	4	5	4	4.5	1	0	0	1	1	1	0.666667
IPI00119219	56348	HSD17B12	3	2	1	4	2	6	3	5	4	1	2	5	7	4	2	2	4	5	4	6	3.83333	1	2	2	4	3	4	2.66667
IPI00116770	19330	RAB18	6	4	4	7	5	2	4.66667	2	3	0	5	6	6	3.66667	2	5	2	4	3	4	3.33333	2	0	2	3	3	0	1.66667
IPI00133706	76308	RAB1B	4	4	4	4	4	4	4	3	3	4	4	4	4	3.66667	4	3	3	4	2	2	3	5	1	1	4	1	0	2
IPI00117705	13200	DDOST	0	1	2	2	3	2	1.66667	2	2	0	1	0	2	1.16667	1	1	0	2	2	4	1.66667	8	9	9	11	4	2	7.16667
IPI00124830	16423	CD47	3	4	3	2	3	3	3	4	4	4	4	5	5	4.33333	4	4	3	4	3	3	3.5	1	2	0	1	1	0	0.833333
IPI00270767	68585	RTN4	2	0	0	1	2	1	1	3	4	6	9	5	6	5.5	2	5	3	5	4	11	5	0	0	0	0	0	0	0
IPI00109946	12506	CD48	4	5	4	5	3	4	4.16667	0	1	0	2	2	2	1.16667	6	4	5	3	5	5	4.66667	0	1	3	4	0	0	1.33333
IPI00114396	16859	LGALS9	2	2	2	4	3	2	2.5	2	2	2	2	2	2	2	3	4	2	3	4	4	3.33333	4	2	4	4	3	2	3.16667
IPI00223987	240028	LNPEP	3	3	2	2	1	2	2.16667	3	1	2	3	6	4	3.16667	2	0	4	3	3	3	2.5	6	5	2	2	2	2	3.16667
IPI00406609	19271	PTPRJ	7	6	6	3	7	0	4.83333	5	2	2	4	4	2	3.16667	1	4	4	1	2	2	2.33333	2	0	1	0	0	0	0.5
IPI00229516	16419	ITGB5	12	9	7	5	7	5	7.5	1	0	2	2	0	1	1	5	2	1	2	1	2	2.16667	1	0	0	0	0	0	0.166667
IPI00128859	18605	ENPP1	4	7	2	11	6	7	6.16667	3	1	0	3	3	3	2.16667	1	4	3	2	1	3	2.33333	0	0	0	0	0	0	0
IPI00230422	27061	BCAP31	6	2	2	4	4	5	3.83333	2	4	2	3	4	4	3.16667	3	2	3	2	1	3	2.33333	2	2	2	2	0	0	1.33333
IPI00131498	17064	C1QR1	4	6	2	8	3	6	4.83333	0	0	0	0	0	0	0	9	3	5	3	8	5	5.5	1	0	1	0	0	0	0.333333
IPI00674255	54712	PLXNC1	7	11	6	3	9	10	7.66667	0	0	1	1	2	0	0.666667	1	0	0	3	1	1	1	0	1	0	0	3	0	0.666667
IPI00117572	21939	CD40	0	0	0	0	0	0	0	4	9	9	13	15	8	9.66667	0	0	0	0	0	0	0	0	0	0	0	0	0	0
IPI00322543	21391	TBXAS1	0	0	0	0	0	0	0	0	0	0	0	0	0	0	0	0	0	0	0	0	0	9	15	11	8	9	6	9.66667
IPI00122599	216984	EVI2B	2	2	2	4	2	2	2.33333	0	2	1	3	4	4	2.33333	7	6	5	6	3	2	4.83333	0	0	0	0	1	0	0.166667
IPI00229340	217303	CD300A	4	8	5	3	6	5	5.16667	1	2	1	1	5	3	2.16667	3	1	2	3	2	1	2	0	0	0	0	0	0	0
IPI00137706	17524	MPP1	2	2	2	0	1	2	1.5	0	0	2	4	3	3	2	4	4	4	4	6	3	4.16667	1	0	1	5	2	0	1.5
IPI00111181	65114	VPS35	1	1	1	3	0	3	1.5	0	0	0	4	5	3	2	3	3	3	4	4	3	3.33333	3	2	5	2	0	2	2.33333
IPI00461212	237542	OSBPL8	2	1	2	2	2	2	1.83333	1	0	2	2	4	3	2	4	3	6	4	7	6	5	1	1	0	0	0	0	0.333333
IPI00117610	433546	LOC433546	2	1	1	0	2	2	1.33333	3	2	0	2	2	4	2.16667	2	4	4	4	3	4	3.5	3	2	0	4	2	1	2
IPI00136972	19124	PROCR	0	0	0	0	0	0	0	7	8	4	10	11	13	8.83333	0	0	0	0	0	0	0	0	0	0	0	0	0	0
IPI00124610	68724	ARL8A	4	4	3	2	4	4	3.5	1	0	1	2	2	2	1.33333	4	2	4	3	2	2	2.83333	2	2	1	1	1	0	1.16667
IPI00120716	14688	GNB1	1	2	4	4	3	2	2.66667	1	0	1	1	1	2	1	2	1	2	2	3	3	2.16667	4	4	6	3	1	0	3
IPI00122937	56620	CLEC4N	0	0	0	0	0	0	0	0	0	0	0	0	0	0	0	0	0	0	0	0	0	9	8	11	11	6	5	8.33333
IPI00131898	24088	TLR2	0	0	0	0	0	0	0	4	4	3	6	10	7	5.66667	2	2	2	2	0	2	1.66667	2	2	1	0	1	0	1
IPI00116283	12462	CCT3	0	0	1	0	0	0	0.166667	0	0	1	2	1	1	0.833333	7	7	6	4	4	2	5	2	1	3	6	2	0	2.33333
IPI00169463	227613	TUBB2C	2	2	3	2	1	2	2	3	4	3	3	2	5	3.33333	2	2	2	2	3	2	2.16667	0	0	0	2	1	2	0.833333
IPI00187289	66950	TMEM206	5	6	5	5	7	6	5.66667	1	2	0	3	2	1	1.5	1	1	2	1	1	0	1	0	0	0	0	0	0	0
IPI00323496	60440	IIGP1	0	0	0	0	0	0	0	5	8	3	8	13	12	8.16667	0	0	0	0	0	0	0	0	0	0	0	0	0	0
IPI00133249	20932	SURF4	3	2	1	2	3	2	2.16667	1	1	0	0	2	1	0.833333	2	2	2	1	2	3	2	4	3	4	4	2	2	3.16667
IPI00115607	231086	HADHB	2	1	0	0	3	2	1.33333	0	1	0	0	1	2	0.666667	0	0	0	3	3	0	1	3	4	4	9	6	4	5
IPI00408421	15488	HSD17B4	0	0	0	0	0	0	0	0	0	0	0	0	0	0	0	0	0	0	0	0	0	6	4	13	13	7	5	8
IPI00119904	56644	CLEC7A	1	7	0	1	0	1	1.66667	0	0	0	0	0	0	0	0	0	0	0	0	0	0	5	8	6	8	6	5	6.33333
IPI00114200	17312	MGL1	6	6	10	7	6	4	6.5	0	0	0	0	0	0	0	0	0	0	0	0	0	0	3	1	0	3	1	1	1.5
IPI00123957	26364	CD97	0	0	0	1	0	0	0.166667	0	0	0	0	0	0	0	0	0	0	0	0	0	0	6	10	9	10	8	3	7.66667
IPI00165731	76192	ABHD12	0	2	1	1	2	3	1.5	0	0	0	2	1	5	1.33333	0	2	0	0	3	0	0.833333	0	2	2	7	3	9	3.83333
IPI00121334	16401	ITGA4	0	0	0	0	0	0	0	6	7	4	5	7	6	5.83333	2	1	3	1	0	2	1.5	0	0	1	0	0	0	0.166667
IPI00121207	14727	GP49A	2	4	5	4	2	2	3.16667	2	1	3	2	3	2	2.16667	3	2	1	2	2	1	1.83333	0	0	0	1	1	0	0.333333
IPI00308885	15510	HSPD1	0	0	0	0	0	0	0	4	4	7	2	2	4	3.83333	2	1	2	2	0	2	1.5	4	3	2	0	2	1	2
IPI00471022	67784	PLXND1	5	7	4	5	5	6	5.33333	0	0	0	0	1	1	0.333333	1	0	1	1	0	0	0.5	2	1	1	1	2	0	1.16667
IPI00131308	80719	IGSF6	6	5	2	3	4	5	4.16667	0	0	0	0	1	4	0.833333	0	2	2	1	2	2	1.5	2	0	1	1	0	1	0.833333
IPI00126585	14961	H2-AB1	2	2	1	1	1	1	1.33333	2	2	2	2	3	4	2.5	0	0	0	1	1	0	0.333333	2	2	3	6	2	3	3
IPI00387204	246177	MYO1G	0	0	0	0	0	0	0	0	0	0	0	0	0	0	0	0	0	0	1	0	0.166667	6	4	8	9	7	7	6.83333
IPI00311654	11937	ATP2A1	2	2	0	2	2	3	1.83333	2	1	1	2	2	2	1.66667	2	2	2	2	2	2	2	0	2	2	2	2	1	1.5
IPI00110224	114664	DHRS8	2	2	2	1	3	1	1.83333	0	2	1	0	0	0	0.5	2	0	2	3	2	3	2	2	2	2	5	2	2	2.5
IPI00135231	15926	IDH1	0	1	0	0	0	0	0.166667	0	0	0	0	0	0	0	1	0	2	1	2	2	1.33333	10	3	8	7	1	2	5.16667
IPI00321648	17381	MMP12	0	0	0	0	0	0	0	0	0	0	0	0	0	0	0	0	0	0	0	0	0	7	9	5	10	4	5	6.66667
IPI00162780	14693	GNB2	2	2	2	2	1	2	1.83333	0	2	2	2	2	4	2	2	2	2	3	2	2	2.16667	1	1	1	1	0	0	0.666667
IPI00127408	19353	RAC1	0	2	2	1	1	2	1.33333	2	2	2	0	3	3	2	2	2	2	2	2	1	1.83333	2	2	2	1	0	0	1.16667
IPI00130661	12751	TPP1	2	0	3	2	2	2	1.83333	2	0	0	1	2	1	1	0	0	2	0	0	0	0.333333	3	3	0	1	5	5	2.83333
IPI00123831	20320	SDFR1	3	4	2	2	3	1	2.5	2	0	2	0	1	1	1	1	1	3	0	2	4	1.83333	0	1	1	1	0	1	0.666667
IPI00556827	67972	ATP2B1	3	2	0	1	0	0	1	0	0	1	3	2	0	1	2	5	1	5	4	3	3.33333	1	2	0	0	0	0	0.5
IPI00454049	93747	ECHS1	0	1	0	0	1	0	0.333333	0	0	0	0	1	0	0.166667	2	1	0	2	2	1	1.33333	4	4	4	4	5	3	4
IPI00170348	216864	MGL2	2	3	4	3	3	4	3.16667	0	0	0	0	0	0	0	0	0	0	0	0	0	0	2	3	4	4	2	1	2.66667
IPI00313998	59010	SQRDL	0	0	0	0	0	0	0	0	0	0	0	0	0	0	0	0	0	1	1	2	0.666667	6	3	3	8	6	4	5
IPI00121833	113868	ACAA1A	0	0	0	0	0	0	0	0	0	0	0	0	0	0	0	0	0	1	1	2	0.666667	6	7	3	2	5	6	4.83333
IPI00127841	11740	SLC25A5	2	0	0	1	1	0	0.666667	0	0	0	0	1	2	0.5	0	1	0	1	0	1	0.5	6	6	3	6	0	1	3.66667
IPI00130624	18807	PLD3	1	2	2	0	1	0	1	0	0	0	0	0	0	0	0	0	0	0	0	0	0	6	6	4	3	4	3	4.33333
IPI00469260	20624	EFTUD2	0	0	0	0	0	0	0	0	0	0	0	0	0	0	0	0	0	0	0	0	0	3	5	6	4	9	3	5
IPI00129911	18187	NRP2	2	1	0	0	0	1	0.666667	0	2	1	5	11	7	4.33333	0	0	0	0	0	0	0	0	0	0	0	0	0	0
IPI00321666	15007	H2-Q10	1	0	3	2	1	1	1.33333	5	2	4	5	3	2	3.5	0	0	0	0	0	0	0	0	0	0	1	0	0	0.166667
IPI00138716	74012	RAP2B	0	2	1	1	0	1	0.833333	2	2	0	2	4	3	2.16667	2	0	1	3	2	2	1.66667	1	0	0	0	0	0	0.166667
IPI00130271	18439	P2RX7	0	0	0	0	0	0	0	1	0	0	2	4	5	2	0	0	0	0	0	0	0	2	1	2	4	4	4	2.83333
IPI00131881	11487	ADAM10	3	3	3	6	3	2	3.33333	0	0	0	0	0	1	0.166667	0	1	1	0	1	0	0.5	0	2	0	3	0	0	0.833333
IPI00129968	13723	EMB	2	2	1	1	1	0	1.16667	4	3	2	1	2	1	2.16667	3	2	1	1	0	0	1.16667	0	0	0	1	1	0	0.333333
IPI00132218	66357	OSTC	0	0	0	0	0	0	0	2	1	0	1	1	3	1.33333	1	0	2	2	0	1	1	2	2	2	4	4	1	2.5
IPI00110849	14960	H2-AA	0	0	1	0	0	0	0.166667	0	2	1	7	8	5	3.83333	0	0	0	0	0	0	0	2	0	0	1	0	1	0.666667
IPI00124829	56378	ARPC3	0	0	0	0	0	0	0	1	2	0	4	2	3	2	0	0	0	2	1	0	0.5	2	2	3	3	1	2	2.16667
IPI00312058	12359	CAT	0	0	0	0	0	0	0	0	0	0	0	0	0	0	0	0	0	0	1	0	0.166667	4	4	7	6	3	2	4.33333
IPI00331387	54486	PTGDS2	0	0	0	0	0	0	0	0	0	0	0	0	0	0	7	3	6	5	4	2	4.5	0	0	0	0	0	0	0
IPI00226430	52538	ACAA2	0	0	0	0	0	0	0	0	0	0	1	0	0	0.166667	0	0	0	1	1	0	0.333333	3	7	2	6	4	2	4
IPI00457501	16145	IGTP	0	0	0	0	0	0	0	4	2	0	4	6	9	4.16667	0	0	0	1	0	1	0.333333	0	0	0	0	0	0	0
IPI00312509	26362	AXL	0	0	0	0	0	0	0	0	0	0	0	0	0	0	0	0	0	0	0	0	0	6	5	5	6	5	0	4.5
IPI00221615	11844	ARF5	1	2	0	0	1	0	0.666667	2	1	1	4	2	4	2.33333	2	2	0	1	1	2	1.33333	0	0	0	1	0	0	0.166667
IPI00313475	11949	ATP5C1	0	0	0	0	0	0	0	1	0	0	0	0	0	0.166667	0	0	0	0	0	0	0	3	5	6	5	4	2	4.16667
IPI00115546	14681	GNAO1	0	0	0	1	0	0	0.166667	0	0	2	0	1	0	0.5	0	1	0	0	1	1	0.5	4	6	3	2	0	4	3.16667
IPI00113949	12524	CD86	0	0	0	0	0	0	0	2	4	3	6	6	5	4.33333	0	0	0	0	0	0	0	0	0	0	0	0	0	0
IPI00307966	12494	CD38	0	0	0	0	0	0	0	3	2	2	4	5	6	3.66667	0	0	0	0	0	0	0	0	1	1	0	0	1	0.5
IPI00321058	23960	OAS1G	0	0	0	0	0	0	0	0	2	2	3	2	4	2.16667	2	1	2	3	1	3	2	0	0	0	0	0	0	0
IPI00110852	107513	SSR1	1	0	3	0	1	0	0.833333	0	0	0	0	0	1	0.166667	1	0	0	1	2	0	0.666667	2	3	3	3	1	2	2.33333
IPI00227508	215900	FAM26F	0	0	0	0	0	0	0	5	2	0	5	6	6	4	0	0	0	0	0	0	0	0	0	0	0	0	0	0
IPI00129915	17250	ABCC1	0	0	0	0	0	0	0	2	2	2	2	2	2	2	0	0	0	0	2	0	0.333333	1	1	2	2	3	1	1.66667
IPI00127625	15356	HMGCL	0	0	0	0	1	0	0.166667	0	1	0	2	1	0	0.666667	0	1	1	1	2	1	1	4	2	0	1	3	3	2.16667
IPI00278153	20652	SOAT1	0	0	0	0	0	0	0	0	0	0	0	0	0	0	0	0	0	0	0	0	0	2	4	2	6	5	4	3.83333
IPI00420357	320011	UGCGL1	0	0	0	0	0	0	0	0	0	0	0	0	0	0	0	0	0	0	0	0	0	4	2	3	3	6	5	3.83333
IPI00162870	246256	FCGR3A	1	1	0	1	0	1	0.666667	4	3	1	4	4	2	3	0	0	0	0	0	1	0.166667	0	0	0	0	0	0	0
IPI00462039	12517	CD72	1	2	2	3	2	2	2	0	0	1	1	2	0	0.666667	2	2	1	1	1	0	1.16667	0	0	0	0	0	0	0
IPI00341282	11950	ATP5F1	0	0	0	0	0	0	0	0	0	0	0	1	1	0.333333	0	0	0	0	0	0	0	1	2	2	6	3	6	3.33333
IPI00108685	19262	PTPRA	1	2	0	1	1	0	0.833333	0	0	1	1	1	2	0.833333	1	1	4	2	3	1	2	0	0	0	0	0	0	0
IPI00469253	76438	RFTN1	0	0	0	0	0	1	0.166667	0	0	0	2	0	0	0.333333	0	0	0	0	0	0	0	2	2	2	4	5	4	3.16667
IPI00469307	16976	LRPAP1	0	0	0	0	0	0	0	0	1	0	1	0	1	0.5	0	0	0	0	0	0	0	4	0	4	2	4	4	3
IPI00453869	54396	IIGP2	0	0	0	0	0	0	0	2	2	0	5	6	5	3.33333	0	0	0	0	0	0	0	0	0	0	0	0	0	0
IPI00555085	53606	G1P2	0	0	0	0	0	0	0	3	2	0	5	4	5	3.16667	0	0	0	0	1	0	0.166667	0	0	0	0	0	0	0
IPI00129803	21354	TAP1	0	0	0	0	0	0	0	1	1	0	3	6	5	2.66667	0	1	0	0	0	0	0.166667	1	1	1	0	0	0	0.5
IPI00126042	68365	RAB14	1	0	0	0	0	0	0.166667	0	0	0	0	1	2	0.5	0	0	0	1	0	1	0.333333	2	3	2	0	2	4	2.16667
IPI00137177	19025	PPGB	0	0	0	0	0	0	0	0	0	0	0	0	0	0	0	0	0	0	0	0	0	5	4	3	3	2	2	3.16667
IPI00269076	11637	AK2	0	0	0	0	0	0	0	0	0	0	0	0	0	0	0	0	0	0	0	0	0	3	4	3	3	2	3	3
IPI00121760	72692	HNRPLL	0	0	0	0	0	0	0	0	0	0	0	0	0	0	0	0	0	0	0	0	0	2	2	3	4	4	3	3
IPI00132874	23945	MGLL	0	0	0	0	0	0	0	0	0	0	0	0	0	0	0	0	0	0	0	0	0	2	2	3	7	3	1	3
IPI00122743	226414	DARS	0	0	0	0	0	0	0	0	0	0	0	2	2	0.666667	3	1	2	1	3	3	2.16667	0	0	0	0	0	0	0
IPI00112614	11303	ABCA1	2	6	1	1	1	1	2	0	0	0	0	0	0	0	0	0	1	0	1	1	0.5	0	0	0	0	0	0	0
IPI00131577	15368	HMOX1	0	0	0	0	0	0	0	0	0	0	2	1	0	0.5	0	0	0	0	0	0	0	3	2	1	4	1	1	2
IPI00112549	14081	ACSL1	0	0	0	0	0	0	0	1	1	0	5	5	2	2.33333	0	0	0	0	0	0	0	0	0	0	1	0	0	0.166667
IPI00338854	14679	GNAI3	0	0	0	0	0	0	0	0	0	0	0	0	0	0	0	0	0	0	0	0	0	5	2	2	1	2	3	2.5
IPI00230394	16906	LMNB1	0	0	0	0	0	0	0	0	0	0	0	0	0	0	0	0	0	0	0	0	0	4	2	7	1	0	1	2.5
IPI00123342	12282	HYOU1	0	0	0	0	0	0	0	0	0	0	0	0	0	0	0	0	0	0	0	1	0.166667	1	0	1	2	3	5	2
IPI00319525	110095	PYGL	0	0	0	0	0	0	0	0	0	0	0	0	0	0	0	0	0	0	0	0	0	1	2	2	3	3	2	2.16667
IPI00469987	14544	GDA	0	0	0	0	0	0	0	0	0	0	0	0	0	0	0	0	0	0	0	0	0	4	1	2	3	1	2	2.16667
