# Supplementary material for: Unique Proteomic Signatures Distinguish Macrophages and Dendritic Cells
Source: PLoS One. 2012 Mar 12;7(3):e33297. doi: 10.1371/journal.pone.0033297 (PMC3299764; doi:10.1371/journal.pone.0033297)
Supplement: Table S3 — Plasma membrane proteomics of bone marrow-derived dendritic cells (BmDC). Overlaps between plasma membrane protein expression in BmDCs and the macrophage signatures identified (see Fig. 1 and Table S2), as well as the BmDC signature were identified based on the t-test and G-test. Protein markers of BmDCs (BmDC signature) were defined as those that were consistently up-regulated (G>1.5 and p<0.05; red) or down-regulated (G<−1.5 and p<0.05; green) relative to all macrophage populations tested. (XLSX) [file pone.0033297.s006.xlsx]

## Sheet: Table S3
Table S3: Plasma membrane proteomics of bone marrow-derived dendritic cells
BmM = bone marrow-derived macrophage, M1 = classically activated macrophage, M2 = alternatively activated macrophage, BmDC = bone marrow-derived dendritic cell
G = G-statistic, G-test; T = p-value, T-test
Overlaps between BmDCs and markers of macrophage populations were identifed based on the t-test and G-test
BmDC markers were consistently up-regulated (G>1.5 and p<0.05) or down-regulated (G<-1.5 and p<0.05) relative to all macrophage populations
Red = up-regulated, green = down-regulated
BmDC overlap with M1 signature proteins														BmDC signature proteins
IPI	Entrez	M1 signature protein	M2 Avg	M1 Avg	BmM Avg	BmDC Avg	G (M1/M2)	G (M1/BmM)	G (M1/BmDC)	T (M1/M2)	T (M1/BmM)	T (M1/BmDC)		IPI	Entrez	Protein	BmDC Avg	M2 Avg	M1 Avg	BmM Avg	G (BmDC/BmM)	G (BmDC/M2)	G (BmDC/M1)	T (BmDC/BmM)	T (BmDC/M2)	T (BmDC/M1)
IPI00468481	11947	ATP5B	6.66667	16.6667	9.33333	20.5	4.42762	2.09671	-0.39607	0.000548408	0.0014096	0.193497		IPI00121833	113868	ACAA1A	4.83333	0	0	0.666667	3.56195	6.70042	6.70042	0.0006741	0.000115664	0.000115664
IPI00114641	17254	SLC3A2	26.5	38	26.8333	33.8333	2.06139	1.93293	0.241822	0.0161466	0.0126269	0.32723		IPI00226430	52538	ACAA2	4	0	0.166667	0.333333	3.65697	5.54518	4.37669	0.00195617	0.000879476	0.00134778
IPI00130271	18439	P2RX7	0	2	0	2.83333	2.77259	2.77259	-0.144399	0.0416581	0.0416581	0.430243		IPI00380425	80911	ACOX3	14	0	0	0.833333	14.1458	19.4081	19.4081	3.52619e-05	1.56033e-05	1.56033e-05
IPI00108003	12978	CSF1R	14.8333	0.166667	14	1.83333	-18.963	-17.8269	-1.43	5.62096e-08	2.07171e-06	0.0148845		IPI00269076	11637	AK2	3	0	0	0	4.15888	4.15888	4.15888	3.95485e-07	3.95485e-07	3.95485e-07
IPI00113802	12267	C3AR1	8.5	1.16667	4.33333	0	-6.28044	-1.94033	1.61734	2.62292e-05	0.0015281	0.0808863		IPI00130280	11946	ATP5A1	59.1667	21.5	25.8333	33	7.53203	18.2906	13.4294	9.12127e-06	1.98577e-07	2.08368e-06
IPI00126186	17533	MRC1	152.5	94	137.667	13	-14.0167	-8.28014	69.1762	2.78425e-05	0.000216829	1.41291e-07		IPI00313475	11949	ATP5C1	4.16667	0	0.166667	0	5.77623	5.77623	4.5944	4.02572e-05	4.02572e-05	7.69076e-05
IPI00124700	22042	TFRC	157.667	6	18	0	-175.44	-6.27898	8.31777	3.37506e-10	3.02704e-05	5.15014e-06		IPI00341282	11950	ATP5F1	3.33333	0	0.333333	0	4.62098	4.62098	2.84908	0.00360406	0.00360406	0.00789976
IPI00109946	12506	CD48	4.16667	1.16667	4.66667	1.33333	-1.79014	-2.24869	-0.0111194	0.000144223	0.000129964	0.842994		IPI00312509	26362	AXL	4.5	0	0	0	6.23832	6.23832	6.23832	0.000641066	0.000641066	0.000641066
IPI00119063	16971	LRP1	48.3333	24.3333	103.833	26.1667	-8.0774	-53.0948	-0.0665713	0.00171326	3.26406e-07	0.734986		IPI00312058	12359	CAT	4.33333	0	0	0.166667	4.81263	6.00728	6.00728	0.000321578	0.000198069	0.000198069
IPI00131498	17064	C1QR1	4.83333	0	5.5	0.333333	-6.70042	-7.62462	-0.462098	0.00034144	0.000315669	0.144928		IPI00123957	26364	CD97	7.66667	0.166667	0	0	10.6283	9.24616	10.6283	4.33714e-05	5.71392e-05	4.33714e-05
IPI00123996	18186	NRP1	26.1667	4.66667	17.6667	2	-16.5329	-8.06582	1.09711	5.57599e-09	4.566e-05	0.0101196		IPI00122937	56620	CLEC4N	8.33333	0	0	0	11.5525	11.5525	11.5525	9.95891e-06	9.95891e-06	9.95891e-06
IPI00126245	68428	STEAP3	8.16667	0.666667	4.5	0.666667	-7.51857	-3.18891	0	0.000757059	3.43879e-05	1		IPI00119904	56644	CLEC7A	6.33333	1.66667	0	0	8.77986	2.90251	8.77986	4.90449e-07	0.00334878	4.90449e-07
														IPI00117117	13058	CYBB	20	2.16667	5.33333	2.33333	16.0057	16.5385	9.0437	1.36319e-07	1.66776e-07	1.08019e-06
BmDC overlap with M2 signature proteins														IPI00117705	13200	DDOST	7.16667	1.66667	1.16667	1.66667	3.6896	3.6896	4.80306	0.00447197	0.00371788	0.00208155
IPI	Entrez	M2 signature protein	M2 Avg	M1 Avg	BmM Avg	BmDC Avg	G (M2/M1)	G (M2/BmM)	G (M2/BmDC)	T (M2/BmDC)	T (M2/M1)	T (M2/BmM)		IPI00453776	216238	EEA1	12.8333	0	0.166667	5.16667	3.37211	17.7908	16.2384	0.0185447	6.86885e-05	7.87454e-05
IPI00331214	12491	CD36	69.3333	26.5	41.5	60.3333	19.8392	7.06511	0.625181	0.104973	3.70001e-06	1.2906e-05		IPI00469260	20624	EFTUD2	5	0	0	0	6.93147	6.93147	6.93147	0.000314142	0.000314142	0.000314142
IPI00221921	12527	CD9	6.16667	1	2.33333	8.66667	4.14275	1.79272	-0.423366	0.00670796	6.22958e-06	0.000128743		IPI00677017	226101	FER1L3	74.3333	0.333333	3	3.5	79.3471	99.237	81.8276	1.44515e-05	9.57263e-06	1.41414e-05
IPI00320605	16414	ITGB2	188.5	148.667	153	186.333	4.71697	3.69701	0.0125242	0.78716	0.00136152	0.000783279		IPI00469987	14544	GDA	2.16667	0	0	0	3.00364	3.00364	3.00364	0.00107504	0.00107504	0.00107504
IPI00170348	216864	MGL2	3.16667	0	0	2.66667	4.38993	4.38993	0.0429098	0.410513	1.20698e-06	1.20698e-06		IPI00338854	14679	GNAI3	2.5	0	0	0	3.46574	3.46574	3.46574	0.00124939	0.00124939	0.00124939
IPI00111856	14129	FCGR1	28.6667	52.1667	60.1667	8.16667	-6.93161	-11.4165	12.0866	2.47855e-08	1.02302e-07	6.01759e-08		IPI00115546	14681	GNAO1	3.16667	0.166667	0.5	0.5	2.16216	3.29755	2.16216	0.0114309	0.00544599	0.0142653
IPI00405742	140570	PLXNB2	39.6667	57.5	63.5	0.166667	-3.29164	-5.55597	53.0626	1.21884e-07	0.0219225	0.000124965		IPI00115607	231086	HADHB	5	1.33333	0.666667	1	2.91103	2.26092	3.75062	0.00445136	0.00494711	0.00107504
IPI00308990	12475	CD14	1.33333	28	26.1667	0.833333	-29.8167	-27.4515	0.116431	0.410513	4.72971e-06	8.16622e-08		IPI00121760	72692	HNRPLL	3	0	0	0	4.15888	4.15888	4.15888	9.31882e-06	9.31882e-06	9.31882e-06
IPI00121334	16401	ITGA4	0	5.83333	1.5	0.166667	-8.08672	-2.07944	-0.231049	0.340893	2.45735e-07	0.00569554		IPI00408421	15488	HSD17B4	8	0	0	0	11.0904	11.0904	11.0904	0.000624063	0.000624063	0.000624063
IPI00227969	16403	ITGA6	1.66667	5	16.8333	1	-1.74416	-14.4448	0.168448	0.303532	0.000136385	7.10923e-06		IPI00123342	12282	HYOU1	2	0	0	0.166667	1.82848	2.77259	2.77259	0.0344065	0.0208824	0.0208824
IPI00321058	23960	OAS1G	0	2.16667	2	0	-3.00364	-2.77259	0	1	0.00254727	0.000270296		IPI00135231	15926	IDH1	5.16667	0.166667	0	1.33333	2.41432	5.91025	7.16252	0.0310973	0.00762782	0.00610656
IPI00131898	24088	TLR2	0	5.66667	1.66667	1	-7.85567	-2.31049	-1.38629	0.0208824	0.000311914	0.000537334		IPI00230394	16906	LMNB1	2.5	0	0	0	3.46574	3.46574	3.46574	0.0395597	0.0395597	0.0395597
IPI00270767	68585	RTN4	1	5.5	5	0	-3.42971	-2.91103	1.38629	0.0208824	0.000641066	0.0137741		IPI00469307	16976	LRPAP1	3	0	0.5	0	4.15888	4.15888	1.98122	0.00135278	0.00135278	0.00594063
														IPI00128450	23943	MBC2	26.1667	0.166667	0.833333	2.16667	23.9747	34.4859	29.9923	0.000245237	9.69241e-05	0.000121411
BmDC overlap with BmM signature proteins														IPI00132874	23945	MGLL	3	0	0	0	4.15888	4.15888	4.15888	0.00569554	0.00569554	0.00569554
IPI	Entrez	BmM signature protein	M2 Avg	M1 Avg	BmM Avg	BmDC Avg	G (BmM/M2)	G (BmM/M1)	G (BmM/BmDC)	T (BmM/M2)	T (BmM/M1)	T (BmM/BmDC)		IPI00321648	17381	MMP12	6.66667	0	0	0	9.24196	9.24196	9.24196	5.09233e-05	5.09233e-05	5.09233e-05
IPI00116283	12462	CCT3	0.166667	0.833333	5	2.33333	5.68996	3.30203	0.992285	0.000172958	0.00075023	0.0464246		IPI00387204	246177	MYO1G	6.83333	0	0	0.166667	8.12884	9.47301	9.47301	3.31136e-06	2.06488e-06	2.06488e-06
IPI00469268	12469	CCT8	0.166667	1.66667	8.66667	5.66667	10.592	5.19444	0.632574	1.06762e-07	2.25005e-05	0.132521		IPI00130624	18807	PLD3	4.33333	1	0	0	6.00728	2.24608	6.00728	1.52061e-05	0.000537334	1.52061e-05
IPI00126248	104112	ACLY	0.666667	13.6667	24.5	28.1667	28.7316	3.11764	-0.255481	2.75062e-07	0.00380541	0.355815		IPI00137177	19025	PPGB	3.16667	0	0	0	4.38993	4.38993	4.38993	5.81676e-05	5.81676e-05	5.81676e-05
IPI00453776	216238	EEA1	0	0.166667	5.16667	12.8333	7.16252	5.91025	-3.37211	0.020908	0.0247634	0.0185447		IPI00319525	110095	PYGL	2.16667	0	0	0	3.00364	3.00364	3.00364	3.49766e-05	3.49766e-05	3.49766e-05
IPI00109966	12010	B2M	9.66667	9.5	4.5	4.83333	-1.92848	-1.82576	-0.0119073	0.00107276	0.0275923	0.76818		IPI00469253	76438	RFTN1	3.16667	0.166667	0.333333	0	4.38993	3.29755	2.65058	0.000164748	0.000355099	0.00123687
IPI00117140	14130	FCGR2B	34.3333	12.5	5.66667	7.66667	-22.8136	-2.63466	-0.301135	2.32773e-09	0.00101339	0.176272		IPI00309035	103963	RPN1	12.1667	4	2.33333	3.33333	5.34971	4.32171	7.30671	1.12089e-05	5.9941e-06	6.84245e-07
IPI00321666	15007	H2-Q10	1.33333	3.5	0	0.166667	-1.84839	-4.85203	-0.231049	0.0101196	9.88826e-05	0.340893		IPI00475154	20014	RPN2	11.1667	3.5	2.16667	2.33333	6.28525	4.21356	6.64946	0.000467282	0.000589442	0.000832384
IPI00115976	16402	ITGA5	30.3333	31.3333	15.8333	5	-4.63215	-5.18952	5.91947	0.000433823	0.000859039	6.72644e-05		IPI00127841	11740	SLC25A5	3.66667	0.666667	0.5	0.5	2.71852	2.28648	2.71852	0.0193407	0.0275723	0.0217728
IPI00169585	18733	LILRB3	13.6667	20.3333	7.83333	5.33333	-1.6027	-5.7455	0.477578	0.000715396	8.58565e-06	0.00929025		IPI00278153	20652	SOAT1	3.83333	0	0	0	5.31413	5.31413	5.31413	0.000159234	0.000159234	0.000159234
IPI00137311	18844	PLXNA1	12	9.5	1.5	4.33333	-9.29651	-6.48648	-1.43617	0.000323007	0.00915108	0.0134385		IPI00313998	59010	SQRDL	5	0	0	0.666667	3.75062	6.93147	6.93147	0.000610694	0.000112131	0.000112131
IPI00109254	60533	CD274	1.66667	13.8333	0	0	-2.31049	-19.1771	0	0.0218723	0.000325221	1		IPI00322543	21391	TBXAS1	9.66667	0	0	0	13.4008	13.4008	13.4008	1.65087e-05	1.65087e-05	1.65087e-05
IPI00128903	75345	SLAMF7	6.83333	14.1667	2.33333	1	-2.30768	-9.42562	0.548553	0.000177066	1.29385e-06	0.0224363		IPI00420357	320011	UGCGL1	3.83333	0	0	0	5.31413	5.31413	5.31413	8.04569e-05	8.04569e-05	8.04569e-05
														IPI00121378	11658	ALCAM	16	41	41.8333	38.5	-9.57269	-11.3467	-11.9575	5.46428e-06	5.05776e-08	2.57584e-05
														IPI00135730	11841	ARF2	0.333333	7.83333	5.33333	3.5	-3.04909	-8.53608	-5.3202	5.81676e-05	1.49377e-07	0.000345906
														IPI00343568	17079	CD180	4.5	29.6667	25	25.8333	-16.5807	-20.7411	-15.6971	1.50034e-07	1.78293e-07	1.74097e-05
														IPI00229340	217303	CD300A	0	5.16667	2.16667	2	-2.77259	-7.16252	-3.00364	0.000270296	2.46027e-05	0.0078434
														IPI00122411	13733	EMR1	0.166667	9.5	16.3333	8.33333	-10.1428	-11.7169	-21.0105	1.648e-06	2.86087e-10	1.74904e-05
														IPI00128859	18605	ENPP1	0	6.16667	2.16667	2.33333	-3.23469	-8.54882	-3.00364	0.000817183	0.000591077	0.00254727
														IPI00122599	216984	EVI2B	0.166667	2.33333	2.33333	4.83333	-5.47002	-2.24109	-2.24109	0.000181731	0.000169748	0.010281
														IPI00111856	14129	FCGR1	8.16667	28.6667	52.1667	60.1667	-44.7167	-12.0866	-35.8016	1.25241e-09	2.47855e-08	1.05792e-09
														IPI00110806	14972	H2-K1	2.83333	21.5	27	14.6667	-8.76163	-16.2244	-22.6288	2.47668e-07	3.75975e-06	1.05225e-05
														IPI00109996	14980	H2-L	3.83333	23.8333	22	16.6667	-8.66394	-16.0919	-14.1177	1.89888e-05	9.64898e-07	2.2087e-05
														IPI00126969	15006	H2-Q1	4.5	16.1667	12.5	11.3333	-3.04827	-6.98997	-3.91766	0.000131043	9.43155e-05	7.91842e-05
														IPI00115976	16402	ITGA5	5	30.3333	31.3333	15.8333	-5.91947	-20.172	-21.2577	6.72644e-05	9.28971e-07	4.47398e-06
														IPI00132474	16412	ITGB1	11.6667	33	46.3333	32.5	-10.2284	-10.6168	-22.174	1.62481e-06	5.16055e-05	3.34824e-06
														IPI00169818	211228	LRRC25	0.333333	9.66667	15.8333	14.8333	-17.821	-10.94	-19.1643	1.12603e-08	2.98968e-05	8.62614e-05
														IPI00129646	17085	LY9	1	18.8333	8	4.5	-2.40909	-19.5714	-6.19767	0.00659541	8.32826e-08	0.0012218
														IPI00658632	17476	MPEG1	0.166667	5.16667	6	4.16667	-4.5944	-5.91025	-7.01639	0.00058689	0.000654884	0.000184167
														IPI00126186	17533	MRC1	13	152.5	94	137.667	-120.321	-138.336	-69.1762	2.51779e-10	2.10374e-10	1.41291e-07
														IPI00405742	140570	PLXNB2	0.166667	39.6667	57.5	63.5	-85.946	-53.0626	-77.6613	2.77719e-10	1.21884e-07	1.94259e-06
														IPI00129158	19261	PTPNS1	2.83333	22.8333	15.6667	24.1667	-19.2968	-17.752	-9.80527	3.47147e-09	1.96305e-06	9.40829e-05
														IPI00230510	20612	SN	0	8.33333	10.5	9.33333	-12.9387	-11.5525	-14.5561	7.93595e-06	1.12746e-06	0.000282271
														IPI00319509	16790	ANPEP	43.1667	124.167	56.8333	60.6667	-2.96356	-40.9051	-1.87364	0.00308878	3.78034e-06	0.0410448
														IPI00124700	22042	TFRC	0	157.667	6	18	-24.9533	-218.572	-8.31777	3.4656e-07	2.17178e-10	5.15014e-06
