# Supplementary material for: Unique Proteomic Signatures Distinguish Macrophages and Dendritic Cells
Source: PLoS One. 2012 Mar 12;7(3):e33297. doi: 10.1371/journal.pone.0033297 (PMC3299764; doi:10.1371/journal.pone.0033297)
Supplement: Table S4 — Plasma membrane proteomics of thioglycolate-elicited myeloid peritoneal cells (eMPCs). Overlaps between plasma membrane protein expression in eMPCs and BmMs, M1, M2, and BmDCs (highlighted in blue) were identified based on the t-test and G-test. For example, overlaps between eMPCs and the BmDC signature were defined as those proteins for which expression in eMPCs (like BmDCs) is consistently up-regulated (G>1.5 and p<0.05; red) or down-regulated (G<−1.5 and p<0.05; green) relative to all macrophage populations tested. (XLSX) [file pone.0033297.s007.xlsx]

## Sheet: Table S4
Table S4: Plasma membrane proteomics of thioglycolate-elicited myeloid peritoneal cells
BmM = bone marrow-derived macrophage, M1 = classically activated macrophage, M2 = alternatively activated macrophage, BmDC = bone marrow-derived dendritic cell, eMPC = thioglycolate-elicited peritoneal myeloid cell
G = G-statistic, G-test; T = p-value, t-test
Overlaps between eMPCs and a given cell signature were for proteins whose expression was consistently up- or down-regulated (based on the t-test and G-test) in ePMCs relative to all other cell types; highlighted in blue
Red = up-regulated, Green = down-regulated
eMPC overlap with BmDC signature proteins
IPI	Entrez	Protein	M2 Avg	M1 Avg	BmM Avg	BmDC Avg	eMPC Avg	G eMPC/BmM	G eMPC/M1	G eMPC/M2	T eMPC/BmM	T eMPC/M1	T eMPC/M2
IPI00677017	226101	FER1L	0.333333	3	3.5	74.3333	51.8	50.5684	52.7058	68.2393	7.60621e-10	2.04265e-09	1.61904e-10
IPI00130280	11946	ATP5A1	21.5	25.8333	33	59.1667	30.3	-0.115201	0.3558	1.50226	0.29432	0.147614	0.00272955
IPI00128450	23943	MBC2	0.166667	0.833333	2.16667	26.1667	40	41.3721	48.4711	53.5219	6.82547e-09	3.21595e-10	2.25193e-10
IPI00117117	13058	CYBB	2.16667	5.33333	2.33333	20	4.5	0.698993	-0.0707062	0.834215	0.000234982	0.161699	0.00166568
IPI00380425	80911	ACOX3	0	0	0.833333	14	5.6	3.9584	7.76325	7.76325	2.03551e-05	5.25238e-09	5.25238e-09
IPI00453776	216238	EEA1	0	0.166667	5.16667	12.8333	6.7	0.198682	7.95049	9.28817	0.513334	3.69851e-05	2.52818e-05
IPI00309035	103963	RPN1	4	2.33333	3.33333	12.1667	8.1	2.04926	3.37347	1.5	0.00451316	0.000408427	0.00494892
IPI00475154	20014	RPN2	3.5	2.16667	2.33333	11.1667	13	8.17836	8.58527	5.82099	1.24628e-05	5.73966e-05	2.3348e-06
IPI00322543	21391	TBXAS1	0	0	0	9.66667	3.7	5.12929	5.12929	5.12929	6.12148e-05	6.12148e-05	6.12148e-05
IPI00122937	56620	CLEC4N	0	0	0	8.33333	0	0	0	0	1	1	1
IPI00408421	15488	HSD17B4	0	0	0	8	5.8	8.04051	8.04051	8.04051	6.99947e-05	6.99947e-05	6.99947e-05
IPI00123957	26364	CD97	0.166667	0	0	7.66667	8.4	11.6449	11.6449	10.2326	0.000211791	0.000211791	0.000260848
IPI00117705	13200	DDOST	1.66667	1.16667	1.66667	7.16667	7.7	4.21309	5.38685	4.21309	8.40296e-05	1.61499e-05	3.46839e-05
IPI00387204	246177	MYO1G	0	0	0.166667	6.83333	0	-0.231049	0	0	0.389283	1	1
IPI00321648	17381	MMP12	0	0	0	6.66667	0	0	0	0	1	1	1
IPI00119904	56644	CLEC7A	1.66667	0	0	6.33333	0	0	0	-2.31049	1	1	0.198201
IPI00135231	15926	IDH1	0.166667	0	1.33333	5.16667	2.3	0.26031	3.18848	2.19951	0.166715	0.00179768	0.00405564
IPI00469260	20624	EFTUD2	0	0	0	5	6.2	8.59503	8.59503	8.59503	7.04251e-05	7.04251e-05	7.04251e-05
IPI00313998	59010	SQRDL	0	0	0.666667	5	3.4	2.00902	4.7134	4.7134	0.000373778	2.90908e-06	2.90908e-06
IPI00115607	231086	HADHB	1.33333	0.666667	1	5	6.6	4.6173	5.61851	3.81338	5.56721e-05	1.10511e-06	2.12766e-05
IPI00121833	113868	ACAA1A	0	0	0.666667	4.83333	10.6	10.5561	14.6947	14.6947	2.41052e-06	6.95428e-07	6.95428e-07
IPI00312509	26362	AXL	0	0	0	4.5	0	0	0	0	1	1	1
IPI00312058	12359	CAT	0	0	0.166667	4.33333	5.1	5.8221	7.0701	7.0701	0.000123627	7.67347e-05	7.67347e-05
IPI00130624	18807	PLD3	1	0	0	4.33333	2.3	3.18848	3.18848	0.526265	0.00079167	0.00079167	0.0638653
IPI00313475	11949	ATP5C1	0	0.166667	0	4.16667	2.3	3.18848	2.19951	3.18848	0.000145633	0.000565044	0.000145633
IPI00226430	52538	ACAA2	0	0.166667	0.333333	4	5.6	5.6583	6.48454	7.76325	2.15915e-06	1.15265e-06	4.44292e-07
IPI00278153	20652	SOAT1	0	0	0	3.83333	3.3	4.57477	4.57477	4.57477	0.000190219	0.000190219	0.000190219
IPI00420357	320011	UGCGL1	0	0	0	3.83333	19.2	26.6169	26.6169	26.6169	9.71587e-06	9.71587e-06	9.71587e-06
IPI00127841	11740	SLC25A5	0.666667	0.5	0.5	3.66667	1.7	0.691624	0.691624	0.466729	0.0185663	0.0420034	0.0686773
IPI00341282	11950	ATP5F1	0	0.333333	0	3.33333	5.1	7.0701	5.02564	7.0701	3.5515e-07	2.33127e-06	3.5515e-07
IPI00469253	76438	RFTN1	0.166667	0.333333	0	3.16667	2.2	3.04985	1.5391	2.07517	5.19932e-06	0.00200117	7.09008e-05
IPI00115546	14681	GNAO1	0.166667	0.5	0.5	3.16667	1.3	0.368298	0.368298	0.994682	0.0725563	0.134225	0.0113286
IPI00137177	19025	PPGB	0	0	0	3.16667	0	0	0	0	1	1	1
IPI00269076	11637	AK2	0	0	0	3	2.7	3.74299	3.74299	3.74299	1.15751e-07	1.15751e-07	1.15751e-07
IPI00469307	16976	LRPAP1	0	0.5	0	3	2.9	4.02025	1.8739	4.02025	1.58615e-06	9.40674e-05	1.58615e-06
IPI00132874	23945	MGLL	0	0	0	3	0	0	0	0	1	1	1
IPI00121760	72692	HNRPLL	0	0	0	3	0	0	0	0	1	1	1
IPI00230394	16906	LMNB1	0	0	0	2.5	1.2	1.66355	1.66355	1.66355	0.000553397	0.000553397	0.000553397
IPI00338854	14679	GNAI3	0	0	0	2.5	0	0	0	0	1	1	1
IPI00469987	14544	GDA	0	0	0	2.16667	1.1	1.52492	1.52492	1.52492	0.00898852	0.00898852	0.00898852
IPI00319525	110095	PYGL	0	0	0	2.16667	0	0	0	0	1	1	1
IPI00123342	12282	HYOU1	0	0	0.166667	2	10.8	13.4767	14.972	14.972	1.02602e-08	5.1686e-09	5.1686e-09
IPI00319509	16790	ANPEP	124.167	56.8333	60.6667	43.1667	38.1	-5.20196	-3.72105	-48.0755	5.8135e-06	0.00328145	4.39102e-06
IPI00121378	11658	ALCAM	41	41.8333	38.5	16	27.8	-1.73442	-2.84763	-2.54833	0.00639646	0.0070095	0.000184273
IPI00126186	17533	MRC1	152.5	94	137.667	13	6.4	-147.349	-91.5642	-166.63	1.51041e-09	4.02194e-07	1.41913e-09
IPI00132474	16412	ITGB1	33	46.3333	32.5	11.6667	16.1	-5.64429	-15.2743	-5.93758	1.40982e-05	3.24625e-05	0.000590436
IPI00111856	14129	FCGR1	28.6667	52.1667	60.1667	8.16667	3.1	-62.9617	-52.7323	-23.7233	1.8828e-09	7.45347e-10	2.36599e-11
IPI00115976	16402	ITGA5	30.3333	31.3333	15.8333	5	13.4	-0.202781	-7.39551	-6.73102	0.234552	0.000418056	0.000143096
IPI00126969	15006	H2-Q1	16.1667	12.5	11.3333	4.5	0	-15.7113	-17.3287	-22.4118	1.61223e-09	4.08215e-08	5.39576e-06
IPI00343568	17079	CD180	29.6667	25	25.8333	4.5	16.1	-2.27998	-1.9426	-4.08265	0.000753097	0.0167971	0.0002307
IPI00109996	14980	H2-L	23.8333	22	16.6667	3.83333	8.4	-2.77794	-6.3054	-7.70144	0.000433271	0.000381267	1.23555e-05
IPI00129158	19261	PTPNS1	22.8333	15.6667	24.1667	2.83333	9	-7.20005	-1.8244	-6.21647	8.68414e-07	0.0173137	0.000190528
IPI00110806	14972	H2-K1	21.5	27	14.6667	2.83333	3.6	-7.19046	-20.2533	-14.157	7.15632e-08	4.45893e-05	1.42874e-05
IPI00129646	17085	LY9	18.8333	8	4.5	1	2.2	-0.80584	-3.50377	-15.0633	0.0740394	0.00874821	1.08594e-06
IPI00169818	211228	LRRC25	9.66667	15.8333	14.8333	0.333333	0	-20.5634	-21.9497	-13.4008	6.08999e-08	0.000238984	7.742e-05
IPI00135730	11841	ARF2	7.83333	5.33333	3.5	0.333333	0	-4.85203	-7.39357	-10.8593	4.13013e-05	0.000527877	3.73784e-07
IPI00405742	140570	PLXNB2	39.6667	57.5	63.5	0.166667	22.5	-20.3638	-15.8427	-4.80255	2.42755e-06	0.000750075	0.00302281
IPI00122411	13733	EMR1	9.5	16.3333	8.33333	0.166667	1.8	-4.56738	-13.4072	-5.75516	6.61682e-05	0.000162232	7.02076e-08
IPI00122599	216984	EVI2B	2.33333	2.33333	4.83333	0.166667	0	-6.70042	-3.23469	-3.23469	0.000371521	0.0114417	0.000135777
IPI00658632	17476	MPEG1	5.16667	6	4.16667	0.166667	3	-0.19077	-1.01939	-0.581771	0.24233	0.0284035	0.0959276
IPI00230510	20612	SN	8.33333	10.5	9.33333	0	0	-12.9387	-14.5561	-11.5525	3.43974e-05	0.000817279	6.02842e-06
IPI00124700	22042	TFRC	157.667	6	18	0	4.3	-9.04727	-0.281871	-184.841	9.41628e-05	0.256412	4.07019e-09
IPI00229340	217303	CD300A	5.16667	2.16667	2	0	1.7	-0.024351	-0.0564594	-1.83332	0.534645	0.553789	0.00206211
IPI00128859	18605	ENPP1	6.16667	2.16667	2.33333	0	2.7	0.0267345	0.058565	-1.39222	0.572735	0.448785	0.0367419
eMPC overlap with M1 signature proteins
IPI	Entrez	Protein	M2 Avg	M1 Avg	BmM Avg	BmDC Avg	eMPC Avg	G eMPC/M2	G eMPC/BmM	G eMPC/BmDM	T eMPC/M2	T eMPC/BmM	T eMPC/BmDM
IPI00307966	12494	CD38	0	3.66667	0	0.5	0	0	0	-0.693147	1	1	0.0738115
IPI00113949	12524	CD86	0	4.33333	0	0	0	0	0	0	1	1	1
IPI00122411	13733	EMR1	9.5	16.3333	8.33333	0.166667	1.8	-5.75516	-4.56738	1.58489	7.02076e-08	6.61682e-05	0.00134405
IPI00112549	14081	ACSL1	0	2.33333	0	0.166667	0	0	0	-0.231049	1	1	0.389283
IPI00110849	14960	H2-AA	0.166667	3.83333	0	0.666667	0	-0.231049	0	-0.924196	0.389283	1	0.103888
IPI00122973	15894	ICAM1	1.16667	67.3333	5	7.16667	2.3	0.377412	-1.02274	-2.62571	0.0961303	0.0535448	2.12705e-06
IPI00120264	15944	IRGM	0	17.5	1.16667	0	0.6	0.831777	-0.185014	0.831777	0.00618733	0.464906	0.00618733
IPI00457501	16145	IGTP	0	4.16667	0.333333	0	1.4	1.94081	0.705797	1.94081	1.66327e-05	0.00487477	1.66327e-05
IPI00121334	16401	ITGA4	0	5.83333	1.5	0.166667	0	0	-2.07944	-0.231049	1	0.0113878	0.389283
IPI00132286	16408	ITGAL	0	26.5	0	0.166667	0	0	0	-0.231049	1	1	0.389283
IPI00132474	16412	ITGB1	33	46.3333	32.5	11.6667	16.1	-5.93758	-5.64429	0.710882	0.000590436	1.40982e-05	0.075966
IPI00125726	18126	NOS2	0	15.5	0	0	0	0	0	0	1	1	1
IPI00136972	19124	PROCR	0	8.83333	0	0	0	0	0	0	1	1	1
IPI00129803	21354	TAP1	0	2.66667	0.166667	0.5	1.1	1.52492	0.769551	0.230595	0.000109688	0.0046667	0.076045
IPI00117572	21939	CD40	0	9.66667	0	0	0	0	0	0	1	1	1
IPI00131898	24088	TLR2	0	5.66667	1.66667	1	0	0	-2.31049	-1.38629	1	0.00144126	0.0351544
IPI00555085	53606	G1P2	0	3.16667	0.166667	0	0	0	-0.231049	0	1	0.389283	1
IPI00453869	54396	IIGP2	0	3.33333	0	0	0	0	0	0	1	1	1
IPI00323496	60440	IIGP1	0	8.16667	0	0	0	0	0	0	1	1	1
IPI00109254	60533	CD274	1.66667	13.8333	0	0	0	-2.31049	0	0	0.0365905	1	1
IPI00128903	75345	SLAMF7	6.83333	14.1667	2.33333	1	2.7	-1.85292	0.0267345	0.811186	0.000460403	0.513518	0.00193152
IPI00227508	215900	FAM26F	0	4	0	0	0	0	0	0	1	1	1
IPI00162870	246256	FCGR3A	0.666667	3	0.166667	0	0	-0.924196	-0.231049	0	0.0187685	0.389283	1
IPI00331214	12491	CD36	69.3333	26.5	41.5	60.3333	42.8	-6.33834	0.0200482	-2.99531	0.000187558	0.644719	0.00558045
eMPC overlap with M2 signature proteins
IPI	Entrez	Protein	M2 Avg	M1 Avg	BmM Avg	BmDC Avg	eMPC Avg	G eMPC/M1	G eMPC/BmM	G eMPC/BmDM	T eMPC/M1	T eMPC/BmM	T eMPC/BmDM
IPI00131881	11487	ADAM10	3.33333	0.166667	0.5	0.833333	0	-0.231049	-0.693147	-1.15525	0.389283	0.0738115	0.198201
IPI00311682	11928	ATP1A1	43.8333	23.3333	30.5	19.5	19.9	-0.272942	-2.2461	0.00406098	0.245585	0.000771009	0.875727
IPI00124221	11933	ATP1B3	33.8333	19.3333	22	15.1667	15.4	-0.446382	-1.17083	0.00178119	0.0637321	0.000795226	0.881201
IPI00129594	12523	CD84	25.1667	8.66667	10.1667	6.83333	8.4	-0.00416684	-0.168358	0.161409	0.814899	0.104683	0.37624
IPI00117140	14130	FCGR2B	34.3333	12.5	5.66667	7.66667	2.1	-8.21342	-1.70097	-3.37182	6.33361e-05	0.00445398	0.00246181
IPI00120245	16410	ITGAV	32.8333	5.33333	8.33333	4.83333	11.1	2.06732	0.395224	2.53255	0.00379556	0.289823	0.0022273
IPI00229516	16419	ITGB5	7.5	1	2.16667	0.166667	4.9	2.8092	1.08531	5.55795	0.00048214	0.0143502	4.08874e-05
IPI00319509	16790	ANPEP	124.167	56.8333	60.6667	43.1667	38.1	-3.72105	-5.20196	-0.316092	0.00328145	5.8135e-06	0.30731
IPI00129646	17085	LY9	18.8333	8	4.5	1	2.2	-3.50377	-0.80584	0.461189	0.00874821	0.0740394	0.0690752
IPI00114200	17312	MGL1	6.5	0	0	1.5	0	0	0	-2.07944	1	1	0.0238564
IPI00123996	18186	NRP1	26.1667	4.66667	17.6667	2	4.9	0.00569162	-7.66771	1.25753	0.791593	0.000117543	0.000882216
IPI00128859	18605	ENPP1	6.16667	2.16667	2.33333	0	2.7	0.058565	0.0267345	3.74299	0.448785	0.572735	1.00662e-05
IPI00124700	22042	TFRC	157.667	6	18	0	4.3	-0.281871	-9.04727	5.96107	0.256412	9.41628e-05	0.00542166
IPI00674255	54712	PLXNC1	7.66667	0.666667	1	0.666667	1.5	0.328923	0.100678	0.328923	0.0500672	0.338287	0.161699
IPI00187289	66950	TMEM206	5.66667	1.5	1	0	0	-2.07944	-1.38629	0	0.0113878	0.00668929	1
IPI00471022	67784	PLXND1	5.33333	0.333333	0.5	1.16667	0	-0.462098	-0.693147	-1.61734	0.186447	0.0738115	0.00746248
IPI00122048	232975	ATP1A3	41.5	15.3333	20.5	12.1667	18.6	0.31496	-0.0923637	1.35519	0.132141	0.351292	0.00249058
IPI00116277	12464	CCT4	0.166667	3.83333	7.33333	4.5	1.9	-0.664892	-3.41339	-1.08741	0.147495	0.0161131	0.0876196
IPI00308885	15510	HSPD1	0	3.83333	1.5	2	6.9	0.888519	3.76197	2.85389	0.0508718	0.00109728	0.00360649
IPI00122973	15894	ICAM1	1.16667	67.3333	5	7.16667	2.3	-76.3216	-1.02274	-2.62571	3.36488e-08	0.0535448	2.12705e-06
IPI00126248	104112	ACLY	0.666667	13.6667	24.5	28.1667	8.6	-1.16306	-7.96253	-10.9706	0.0785168	8.36631e-05	0.000520103
IPI00677017	226101	FER1L3	0.333333	3	3.5	74.3333	51.8	52.7058	50.5684	-4.0472	2.04265e-09	7.60621e-10	0.0529056
eMPC overlap with BmM signature proteins
IPI	Entrez	Protein	M2 Avg	M1 Avg	BmM Avg	BmDC Avg	eMPC Avg	G eMPC/M2	G eMPC/M1	G eMPC/BmDM	T eMPC/M2	T eMPC/M1	T eMPC/BmDM
IPI00113223	14104	FASN	0	1.66667	14.8333	5.5	0	0	-2.31049	-7.62462	1	0.0931124	0.00160085
IPI00227969	16403	ITGA6	1.66667	5	16.8333	1	6.2	2.78056	0.128819	4.17896	3.96803e-05	0.0621502	1.76447e-05
IPI00119063	16971	LRP1	48.3333	24.3333	103.833	26.1667	94	14.9142	43.7912	40.6398	2.08385e-05	1.74902e-07	3.66418e-07
IPI00331387	54486	PTGDS2	0	0	4.5	0	0	0	0	0	1	1	1
IPI00153959	192187	STAB1	2.5	1.5	12.1667	0	0	-3.46574	-2.07944	0	0.00144126	0.109384	1
