# Supplementary material for: Unique Proteomic Signatures Distinguish Macrophages and Dendritic Cells
Source: PLoS One. 2012 Mar 12;7(3):e33297. doi: 10.1371/journal.pone.0033297 (PMC3299764; doi:10.1371/journal.pone.0033297)
Supplement: Table S5 — Plasma membrane proteins differentially expressed in Csf2 −/− mice. eMPCs isolated from wild-type (wt) and Csf2−/− mice were analyzed by mass spectrometry. Differentially expressed proteins were identified by the t-test (p<0.05) and G-test (G>1.5 or <−1.5). Red = up-regulated and green = down-regulated in eMPCs isolated from Csf2−/− relative to wt mice. (XLSX) [file pone.0033297.s008.xlsx]

## Sheet: Table S5
Table S5: Plasma membrane proteins differentially expressed in Csf2-/- mice.
Csf2- = GM-CSF-deficient, wt = wild-type
G = G-statistic, G-test; T = p-value, t-test
Differentially expressed proteins were identified based on the G-test (G>1.5 or <-1.5) and t-test (p<0.05) in Csf2-/- relative to wt
Red = up-regulated, Green = down-regulated
IPI	Entrez	Protein	G (Csf2-/wt)	T (Csf2-/wt)	Csf2- Avg	wt Avg
IPI00119063	16971	LRP1	12.3753	0.00427074	44	17
IPI00308990	12475	CD14	11.4861	0.00750338	11.3333	0.666667
IPI00121378	11658	ALCAM	9.96874	0.05	14.6667	2.33333
IPI00331214	12491	CD36	6.35277	0.0400123	73	45.6667
IPI00115976	16402	ITGA5	6.17859	0.000759419	19	6.66667
IPI00469307	16976	LRPAP1	5.08308	0.000388171	3.66667	0
IPI00126245	68428	STEAP3	4.18648	0.00749043	9	2.33333
IPI00131498	17064	C1QR1	4.1251	0.0037951	14.6667	5.66667
IPI00129158	19261	PTPNS1	4.10994	8.36435e-05	11.3333	3.66667
IPI00132474	16412	ITGB1	2.57299	0.034752	14.3333	7
IPI00658632	17476	MPEG1	2.56993	0.0326779	5.33333	1.33333
IPI00322543	21391	TBXAS1	1.84839	0.0161301	1.33333	0
IPI00311682	11928	ATP1A1	1.54	0.0207757	31	22
IPI00117117	13058	CYBB	-2.31049	0.00749043	0	1.66667
IPI00128450	23943	MBC2	-3.12821	0.006	2	4
IPI00135730	11841	ARF2	-4.62098	0.0194418	0	3.33
